# Supplementary material
Source: PubMed Central journal article supplement (PMC6003823)
Supplement: NIHMS923972-supplement-supplement_1.pdf [file NIHMS923972-supplement-supplement_1.pdf]

**Supplemental Table S1. List of proteins measured and abbreviations.**

|               |                                                                  |
|---------------|------------------------------------------------------------------|
| Ang-1         | Angiopoietin-1                                                   |
| Ang-2         | Angiopoietin-2                                                   |
| BDNF          | Brain-Derived Neurotrophic Factor                                |
| bFGF          | basic Fibroblast Growth Factor                                   |
| CRP           | C-Reactive Protein                                               |
| EPO           | Erythropoietin                                                   |
| ICAM-1        | Intercellular Adhesion Molecule -1                               |
| IGF-1         | Insulin-like growth factor-1                                     |
| IGFBP-1       | Insulin-like growth factor binding protein-1                     |
| IL-1 $\beta$  | Interleukin-1 $\beta$                                            |
| IL-6          | Interleukin-6                                                    |
| IL-6R         | Interleukin-6 Receptor                                           |
| IL-8          | Interleukin-8                                                    |
| MMP-9         | Matrix Metalloproteinase-9                                       |
| MPO           | Myeloperoxidase                                                  |
| NT-4          | Neurotrophin-4                                                   |
| PIGF          | Placenta Growth Factor                                           |
| RANTES        | Regulated upon Activation, Normal T-cell Expressed, and Secreted |
| SAA           | Serum Amyloid A                                                  |
| TNF-R1        | Tumor Necrosis Factor- $\alpha$ Receptor-1                       |
| TNF-R2        | Tumor Necrosis Factor- $\alpha$ Receptor-2                       |
| TNF- $\alpha$ | Tumor Necrosis Factor- $\alpha$                                  |
| TSH           | Thyroid-Stimulating Hormone                                      |
| VCAM-1        | Vascular Cell Adhesion Molecule -1                               |
| VEGF          | Vascular endothelial growth factor                               |
| VEGF-R1       | Vascular endothelial growth factor Receptor-1                    |
| VEGF-R2       | Vascular endothelial growth factor Receptor-2                    |
